# Supplementary material for: Development of 5-Fluorouracil/pH-Responsive Adjuvant-Embedded Extracellular Vesicles for Targeting αvβ3 Integrin Receptors in Tumors
Source: MDPI journal article supplement (doi:10.3390/pharmaceutics16050599), 2024-04-29
Supplement: s1 [file s1]

## Supplementary Information

# Development of 5-Fluorouracil/pH-Responsive Adjuvant-Embedded Extracellular Vesicles for Targeting $\alpha_v\beta_3$ Integrin Receptors in Tumors

Jiseung Kim <sup>1</sup>, Eunsol Lee <sup>1</sup> and Eun Seong Lee <sup>2,\*</sup>

<sup>1</sup> Department of Biotechnology, The Catholic University of Korea, 43 Jibong-ro, Bucheon-si 1462, Gyeonggi-do, Republic of Korea; wltmd98@naver.com (J.K.); eunsollee13@gmail.com (E.L.)

<sup>2</sup> Department of Biomedical-Chemical Engineering, The Catholic University of Korea, 43 Jibong-ro, Bucheon-si 1462, Gyeonggi-do, Republic of Korea

\* Correspondence: eslee@catholic.ac.kr; Tel.: +82-2-2164-4921

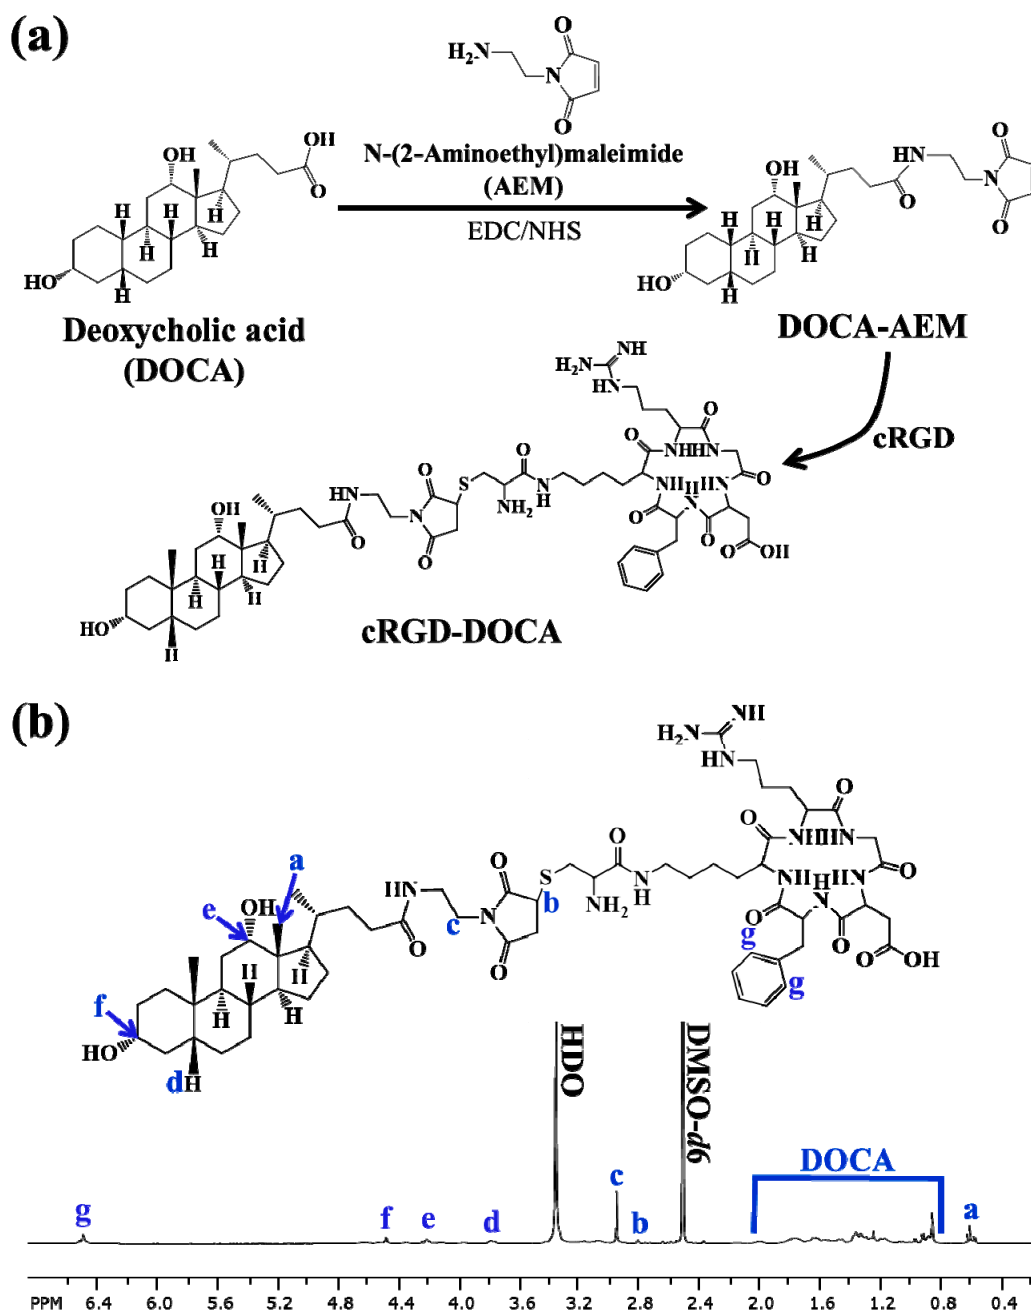

**Figure S1.** (a) Chemical synthesis scheme of cRGD-DOCA. (b)  $^1\text{H}$ -NMR peaks of cRGD-DOCA.

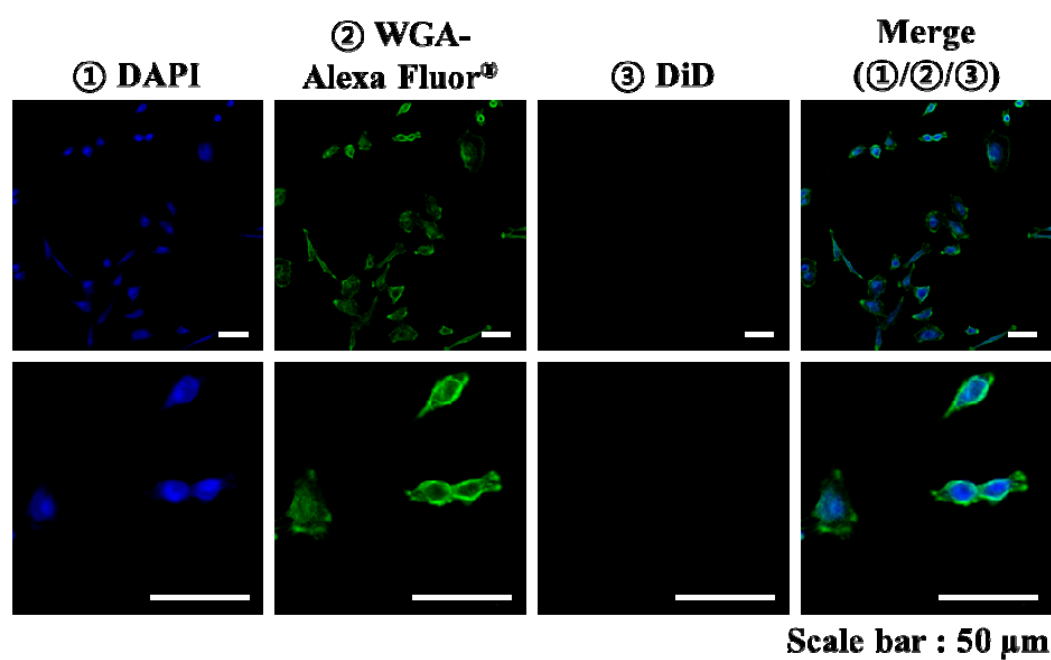

**Figure S2.** Confocal microscope images of B16BL6 cells treated with (5-FU/DEAP-DOCA/cRGD-DOCA)@EVs (without DiD) for 4 h at 37 °C.
